# Supplementary material for: Functional domains of the 50S subunit mature late in the assembly process
Source: PubMed Central journal article supplement — Nucleic Acids Res. 2013 Dec 13;42(5):3419–35. doi: 10.1093/nar/gkt1295 (PMC3950693; doi:10.1093/nar/gkt1295), 2013-12-13
Supplement: supp_gkt1295_nar-02771-r-2013-File009.pdf [file supp_gkt1295_nar-02771-r-2013-File009.pdf]

# Supplementary Data

## Functional Domains of the 50S Subunit Mature Late in the Assembly Process

Ahmad Jomaa<sup>1</sup>✉, Nikhil Jain<sup>2</sup>✉, Joseph H. Davis<sup>3</sup>✉, James R. Williamson<sup>3</sup>,

Robert A. Britton<sup>2\*</sup> and Joaquin Ortega<sup>1\*</sup>

<sup>1</sup>Department of Biochemistry and Biomedical Sciences and MG. DeGroote Institute for Infectious Diseases Research, McMaster University, 1280 Main Street West, Hamilton, Ontario, L8S4K1, Canada; <sup>2</sup>Department of Microbiology and Molecular Genetics, Michigan State University, East Lansing, MI 48824, USA; <sup>3</sup>Department of Molecular Biology, Department of Chemistry and The Skaggs Institute for Chemical Biology, The Scripps Research Institute, La Jolla, CA 92037, USA.

### **This supplement contains:**

Supplementary Figures S1 to S12

Supplementary Tables 1 to 3

Supplementary References

## SUPPLEMENTARY FIGURES

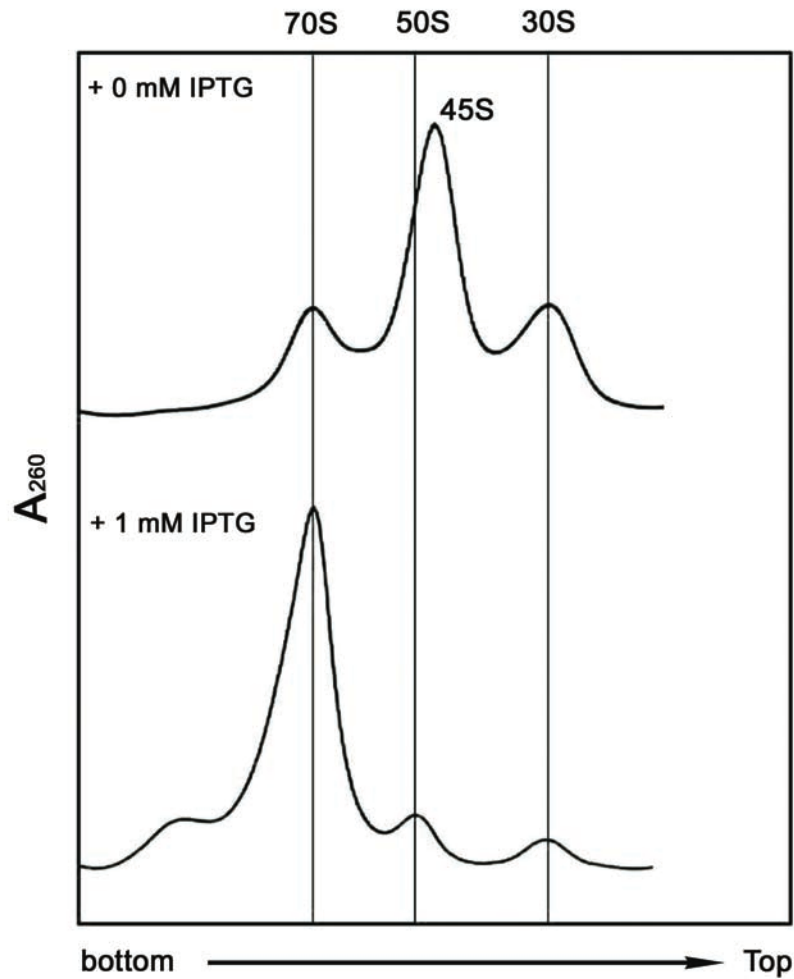

**Supplementary Figure S1. Sedimentation profiles from sucrose gradients of ribosomal particles purified from RbgA depleted *B. subtilis* cells.** The profiles correspond to cells in which transcription of *rbgA* is under the control of an IPTG inducible  $P_{spank}$  promoter (RB301). Cells grown in the presence of the inducer (bottom panel) produce a ribosome profile similar to wild type cells, but absence of the inducer (top panel) caused depletion of RbgA and concomitant accumulation of 45S particles.

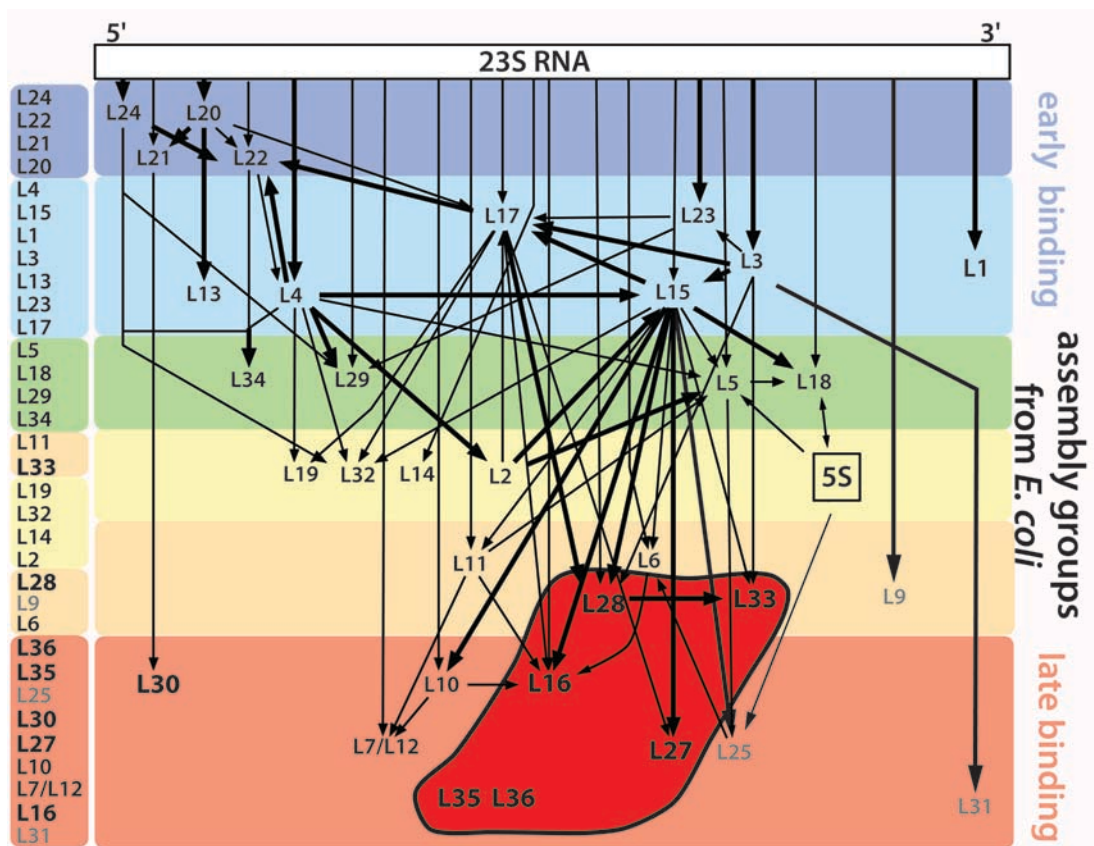

**Supplementary Figure S2. Protein complement of the 45S particle purified from RbgA-depleted *B. subtilis* cells.** Ribosomal proteins are placed in the *in vivo* assembly map for the 50S subunit. Groups of r-proteins exhibiting similar binding profiles as establish in Chen and Williamson 2013<sup>1</sup> are marked with purple (the earliest-binding proteins), cyan, green, yellow, and red (the latest-binding proteins). The dark red box highlights proteins that are significantly depleted or missing from the 45S particles. Proteins we could not identify in both the 45S particles and 50S subunits from IF2-depleted cells are shown in grey.

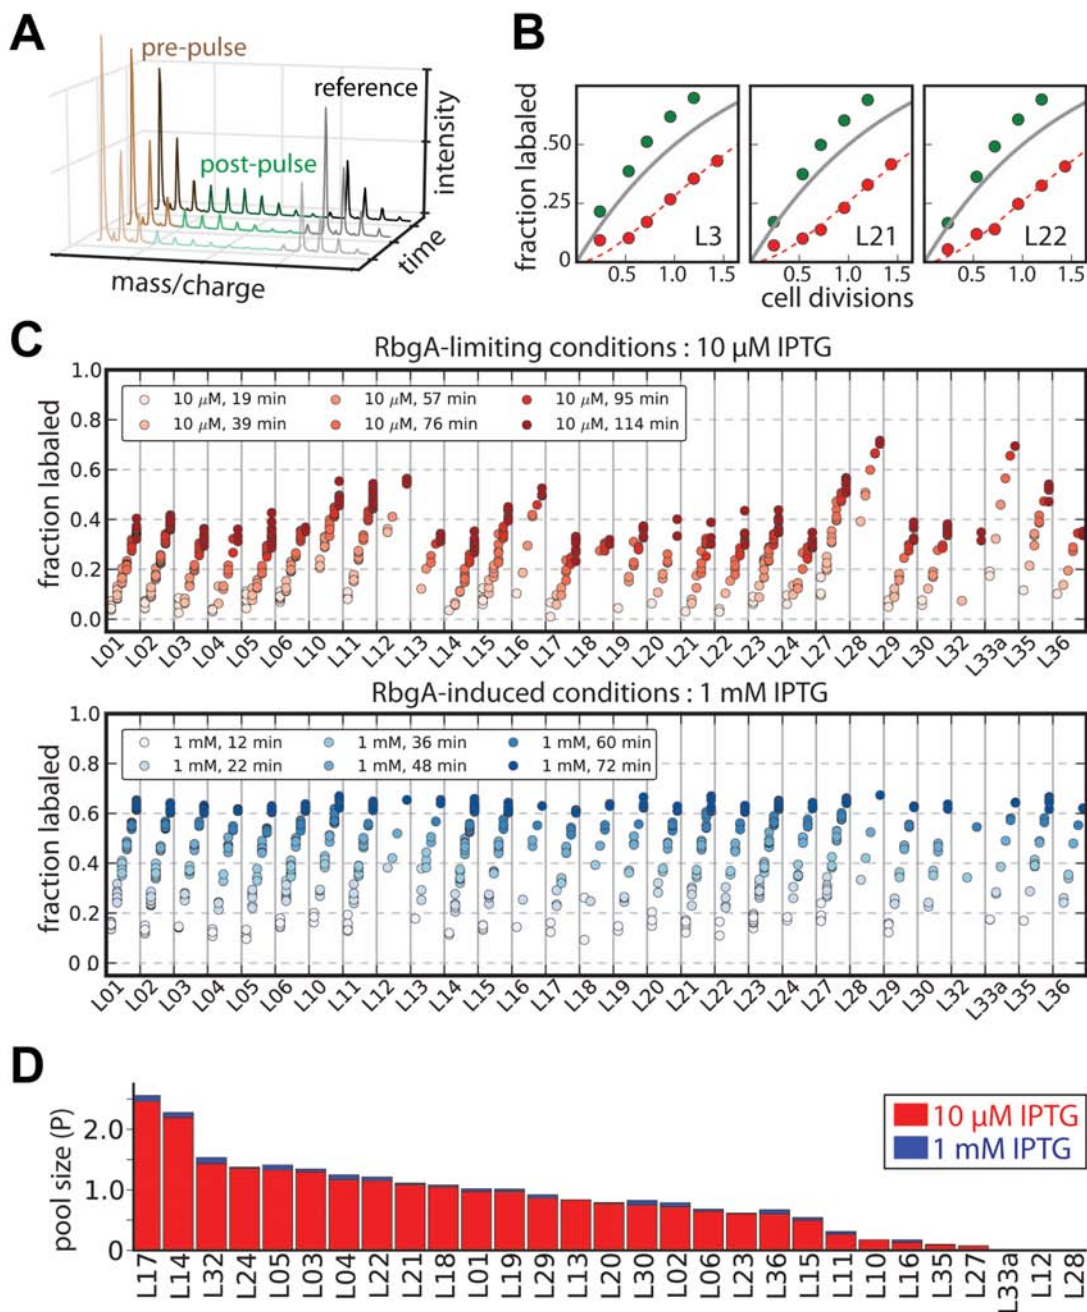

**Supplementary Figure S3. Pulse labeling experiments determined that the 45S particle can mature into a complete ribosome.** (A) Pulse-labeling isotope distribution. Three isotope distributions are fit for each peptide and each time point. The  $^{14}\text{N}$  distribution (brown) is fit to quantify material synthesized before the pulse. The partially-labeled distribution (green) is fit to quantify material synthesized after the pulse. A  $^{15}\text{N}$ -labeled reference standard (black) is included to aid in peptide identification. (B) Labeling kinetics of proteins in 45S particles (green) or 70S

particles (red). The maximum labeling rate in the absence of protein turnover is depicted by the solid grey line. Labeling kinetics of 70S particles were fit as described in <sup>2</sup>(dashed lines). “Overlabeling” (green) was predicted for an on-pathway intermediate as described in Chen et al. 2012<sup>2</sup>. (C) Label incorporation under RbgA-limiting (top) or RbgA-induced (bottom) conditions. Fraction labeled is calculated as [post-pulse]/[post-pulse + pre-pulse]. Each marker represents a unique measurement of a peptide resulting from a tryptic digest of the parent protein. (D) Stacked bar graph of fit pool size (P). For each protein, the small pools (0-0.1) observed in the presence of 1 mM IPTG (blue) are stacked above the large pools (0-2.47) observed in the presence of 10  $\mu$ M IPTG (red). Cellular doubling times were 48 and 85 minutes for the RbgA-induced and RbgA-limited conditions respectively.

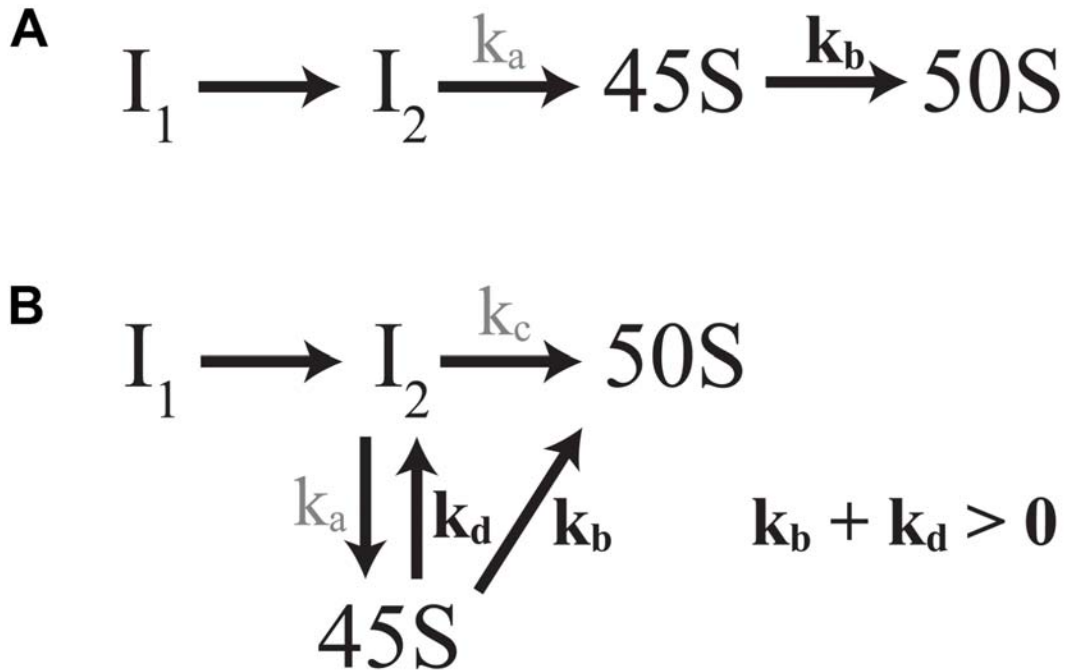

**Supplementary Figure S4. Kinetic models of ribosome biogenesis consistent with pulse labeling experiments.** (A) A linear pathway. RbgA directly catalyzes the conversion of the 45S particle to a mature 50S subunit by increasing the rate of a slow step late in assembly ( $k_b$ , bold). (B) Parallel pathway.  $I_2$  and the 45S can interconvert and each is competent for maturation. RbgA could increase either the  $k_b$  or  $k_d$  rates (bold). Related variants of this model arise if any of  $k_b$ ,  $k_c$ , or  $k_d$  are zero, however, our pulse-labeling results show that either  $k_b$  or  $k_d$  must be nonzero. For example, if  $k_b = 0$ , then RbgA accelerates  $k_d$  and is effectively rescuing the 45S particle and providing multiple opportunities for the  $I_2$  intermediate to properly mature. Alternatively, if  $k_d = 0$ , parallel pathways emerge with RbgA accelerating the rate of 45S-to-50S conversion,  $k_b$ .

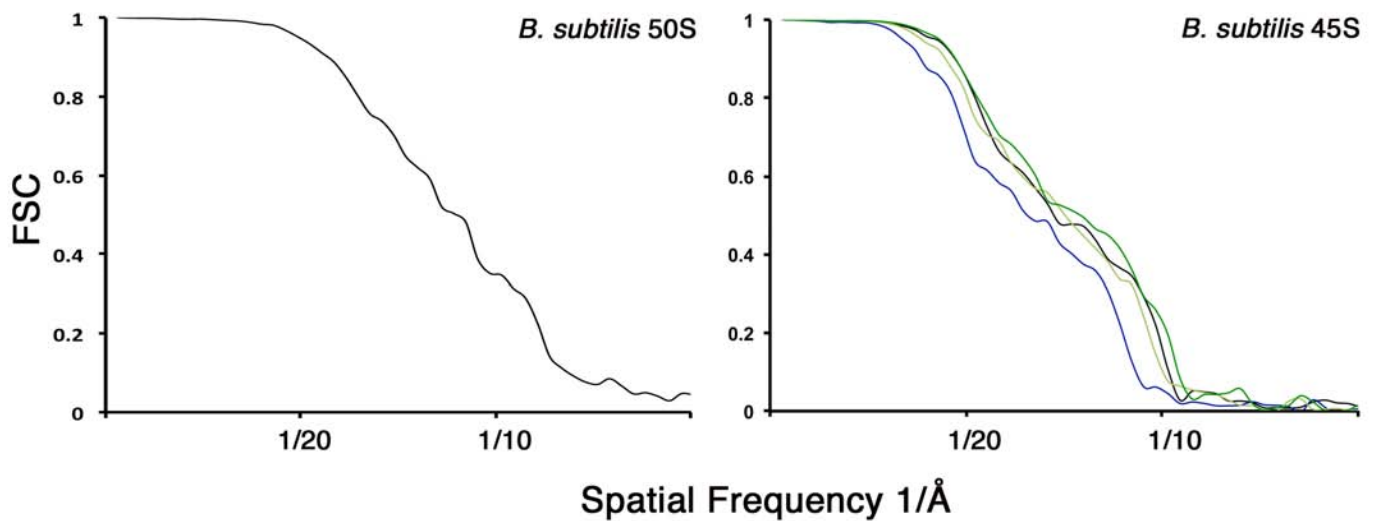

**Supplementary Figure S5. Fourier Shell Correlation plots for resolution estimation of the 3D structures of the 50S subunit and 45S particle.** Using the the FSC=0.5 criteria the estimated resolution for the 3D reconstruction of the mature 50S subunit was 11 Å. In the case of the 45S particle structures the plots correspond to the cryo-EM reconstructions obtained for the four conformational subpopulations: CL1 (black), CL2 (blue), CL3 (orange) and CL4 (green). The estimated resolution was 13 Å resolution for CL1, CL3 and CL4 and 15 Å resolution for CL2.

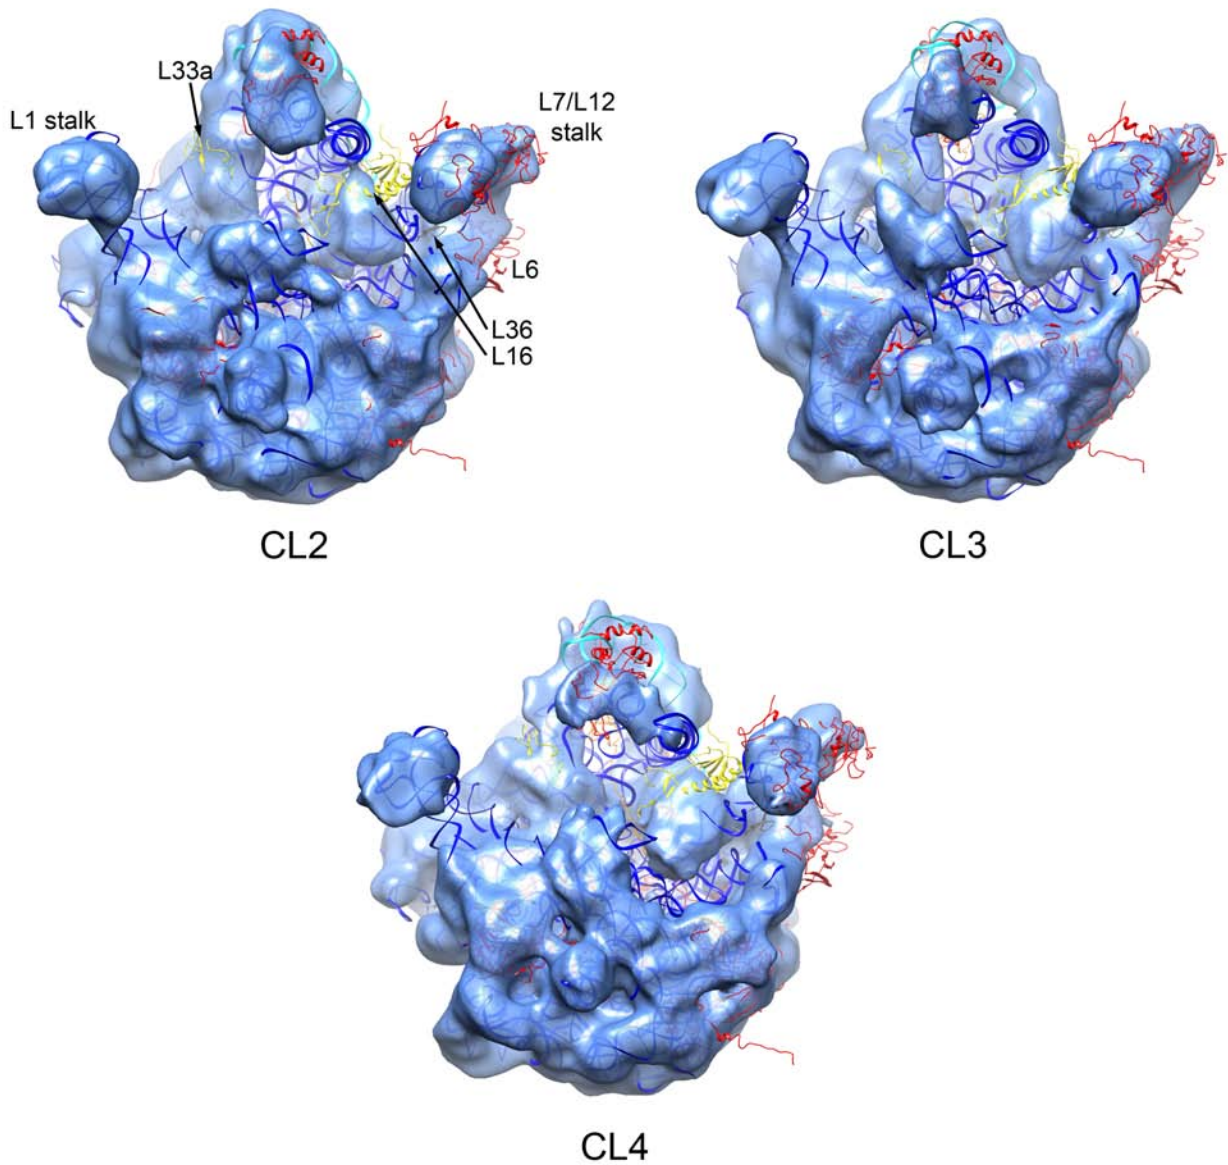

**Supplementary Figure S6. Conformational subpopulations of the 45S particle.** Cryo-EM maps representing three of the conformational subpopulations observed for the 45S particle. The map for class 1 (CL1) is shown in Figure 3B. The X-ray structure of the 50S subunit from *Thermus Thermophilus* (PDB ID 2Y11) is shown docked into the cryo-EM maps. The r-proteins for which a corresponding density was not observed in the cryo-EM map are labeled.



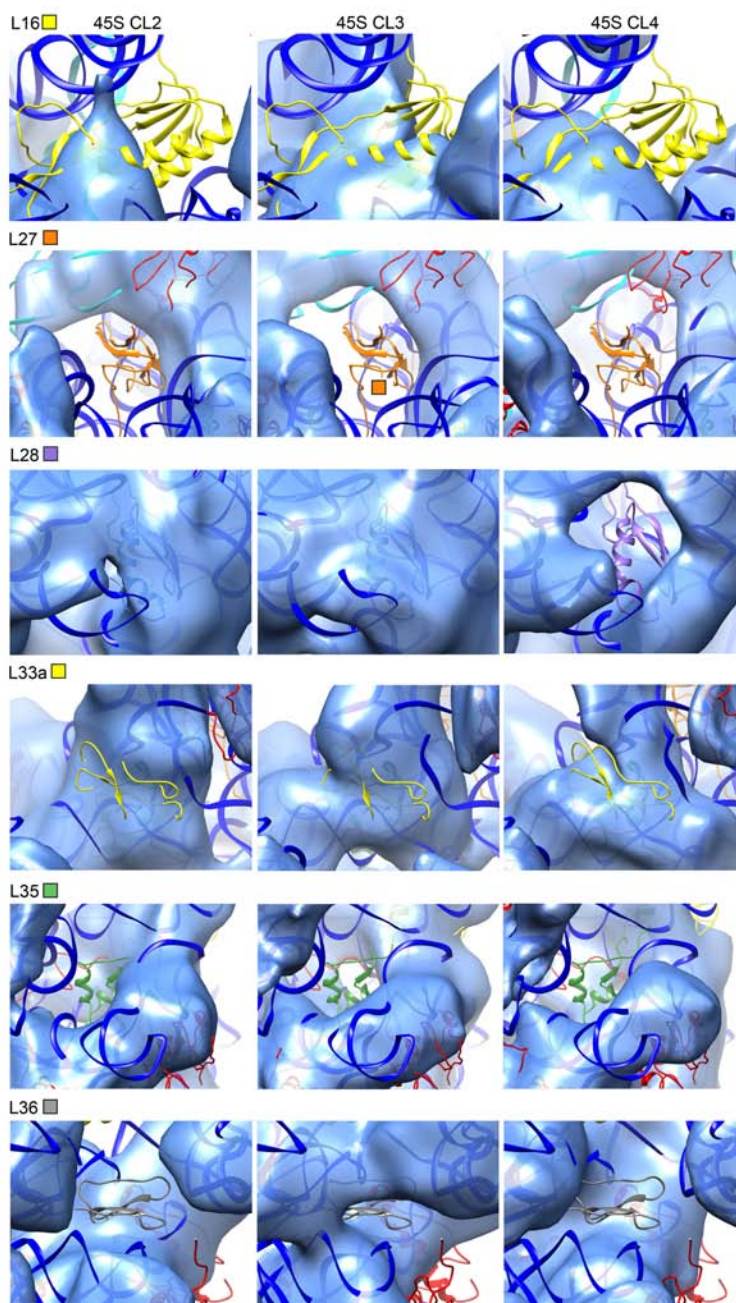

**Supplementary Figure S7. Late binding r-proteins depleted or lacking in the 45S subunit.**

Close-up view of the densities representing the r-proteins found depleted or absent by qMS in the cryo-EM maps of the conformational subpopulations of the 45S particles. Each column shows the densities for these r-proteins in the cryo-EM map of one of the conformational subpopulations of the 45S particles. The X-ray structure of *Thermus Thermophilus* (PDB ID 2Y11) was docked into the cryo-EM maps to aid in the interpretation of the densities. A view of these densities in the conformational subpopulation ‘CL1’ is shown in Figure 4. Proteins are colored as indicated by the color code and the 23S rRNA is shown as a blue ribbon.

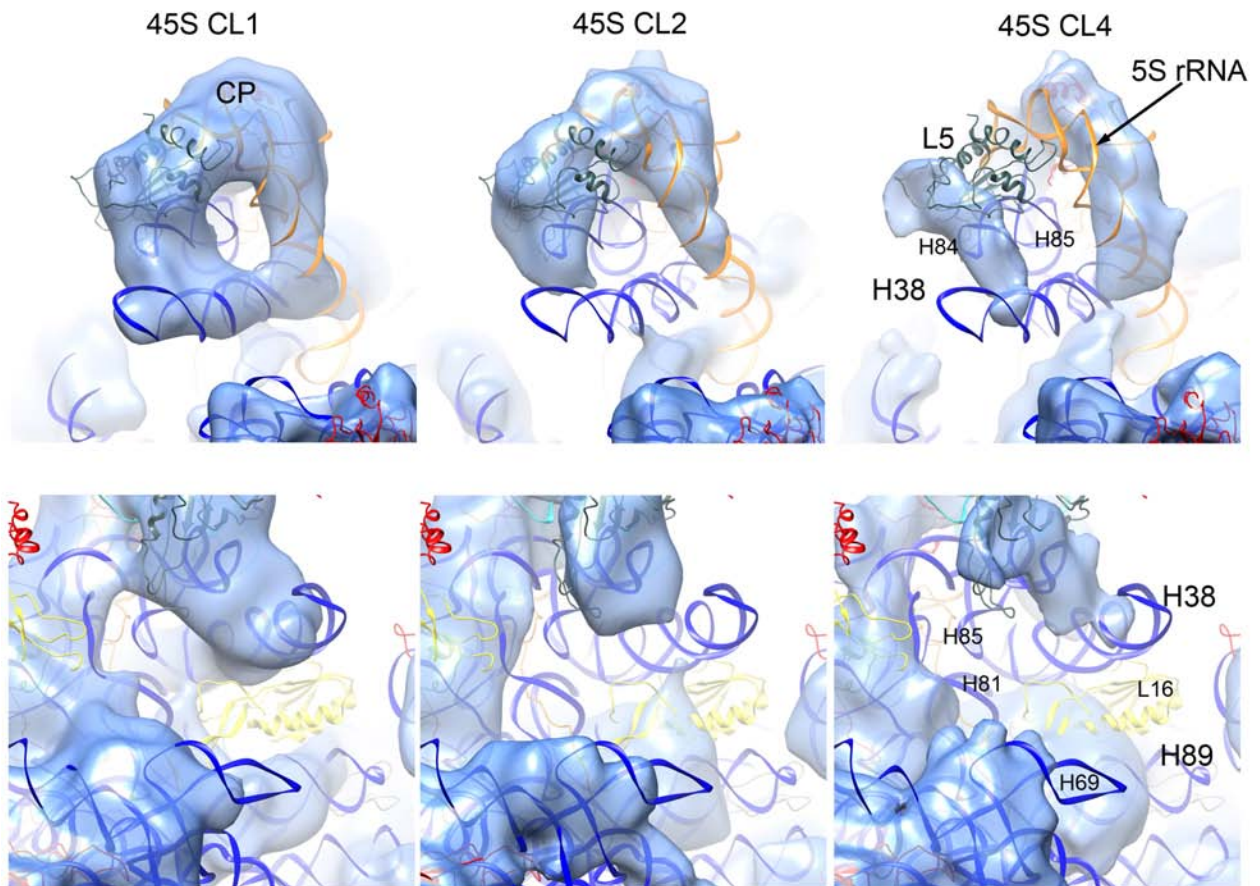

**Supplementary Figure S8. Structural distortions of the central protuberance in the conformational subpopulations of the 45S particle.** Side (from the L7/L12 stalk) (top panels) and front view (bottom panels) of the central protuberance (CP) of the cryo-EM maps of three conformational subpopulations of the 45S particle. Interpretation of the visible densities was done by docking the X-ray structure of the 50S subunit from *Thermus Thermophilus* (PDB ID 2Y11). Similar views of the map obtained for the conformational subpopulation ‘CL3’ is shown in Figure 5A.

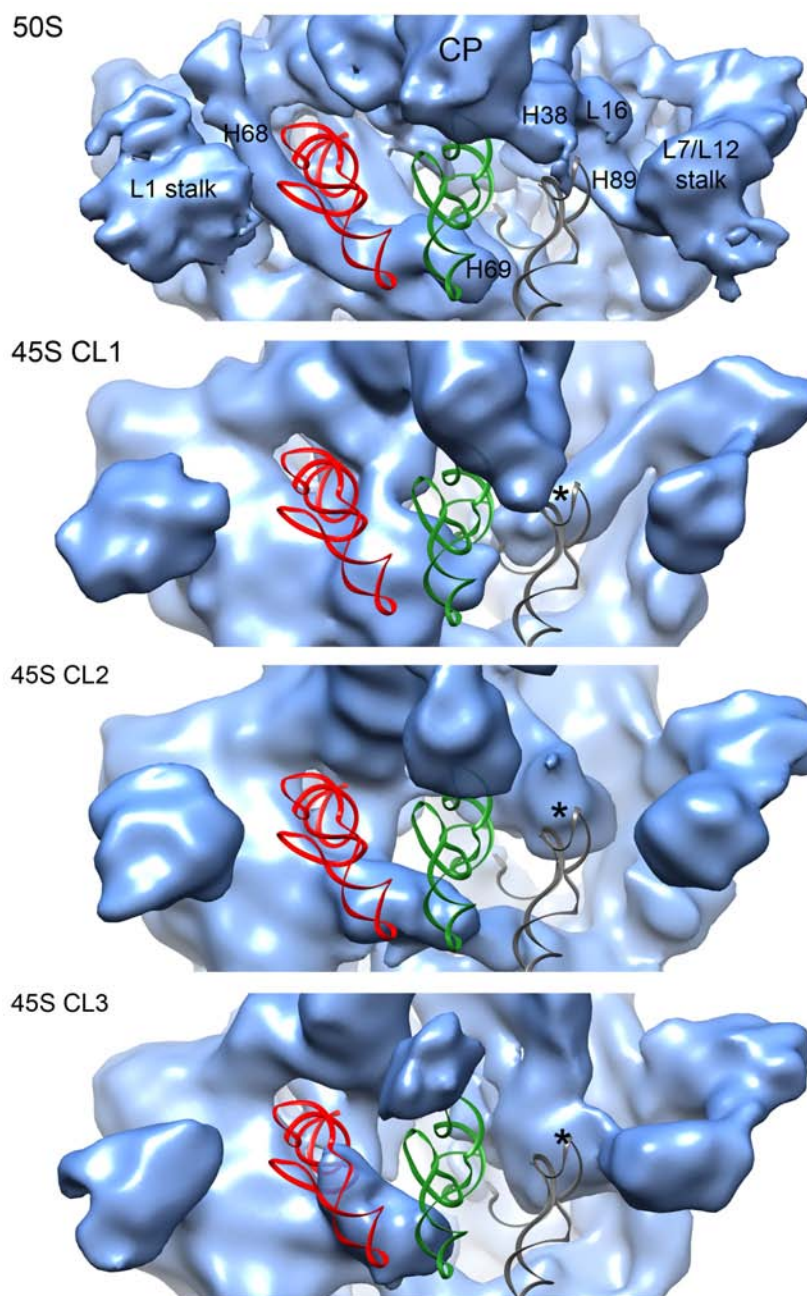

**Supplementary Figure S9. Conformational differences in the tRNA binding sites in the 45S particle.** The A, P and E t-RNA binding sites are compared between the cryo-EM maps of the mature 50S subunit and three of the conformational subpopulations of the 45S particle. An additional map representing a fourth subpopulation of the 45S particle is shown in Figure 5B. Three tRNA molecules from the X-ray structure of the 50S subunit from *Thermus Thermophilus* (PDB ID 1GIY) are shown docked into the A (grey), P (green) and E (red) sites of the cryo-EM map. Important landmarks and rRNA helices that showed distortions in the 45S particles are labeled. A prominent density occupying part of the A site is labeled with an asterisk.

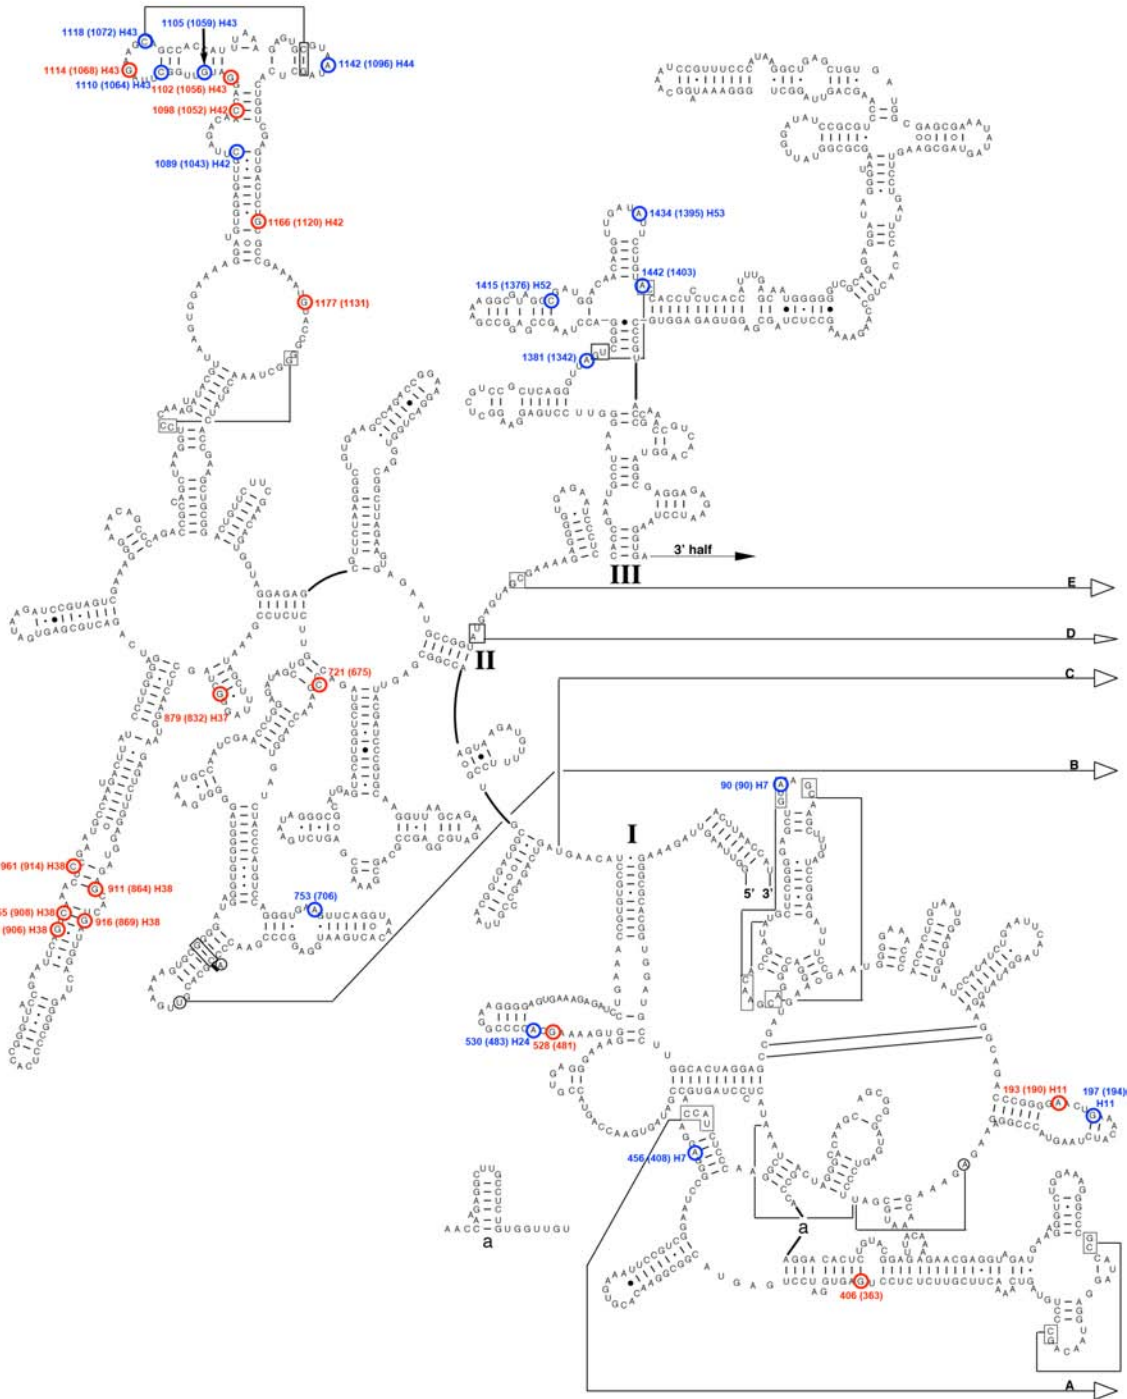

**Supplementary Figure S10. Chemical modifications by DMS and kethoxal mapped in the secondary structure of the 23S rRNA (5'-half).** Bases with increased (red) and decreased (blue) reactivity in the 45S particle compared to the mature 50S subunit are labeled in the secondary structure diagram of the 23S rRNA from *Bacillus subtilis*. Numbers in brackets correspond to *E. coli* numbering of the 23S rRNA).

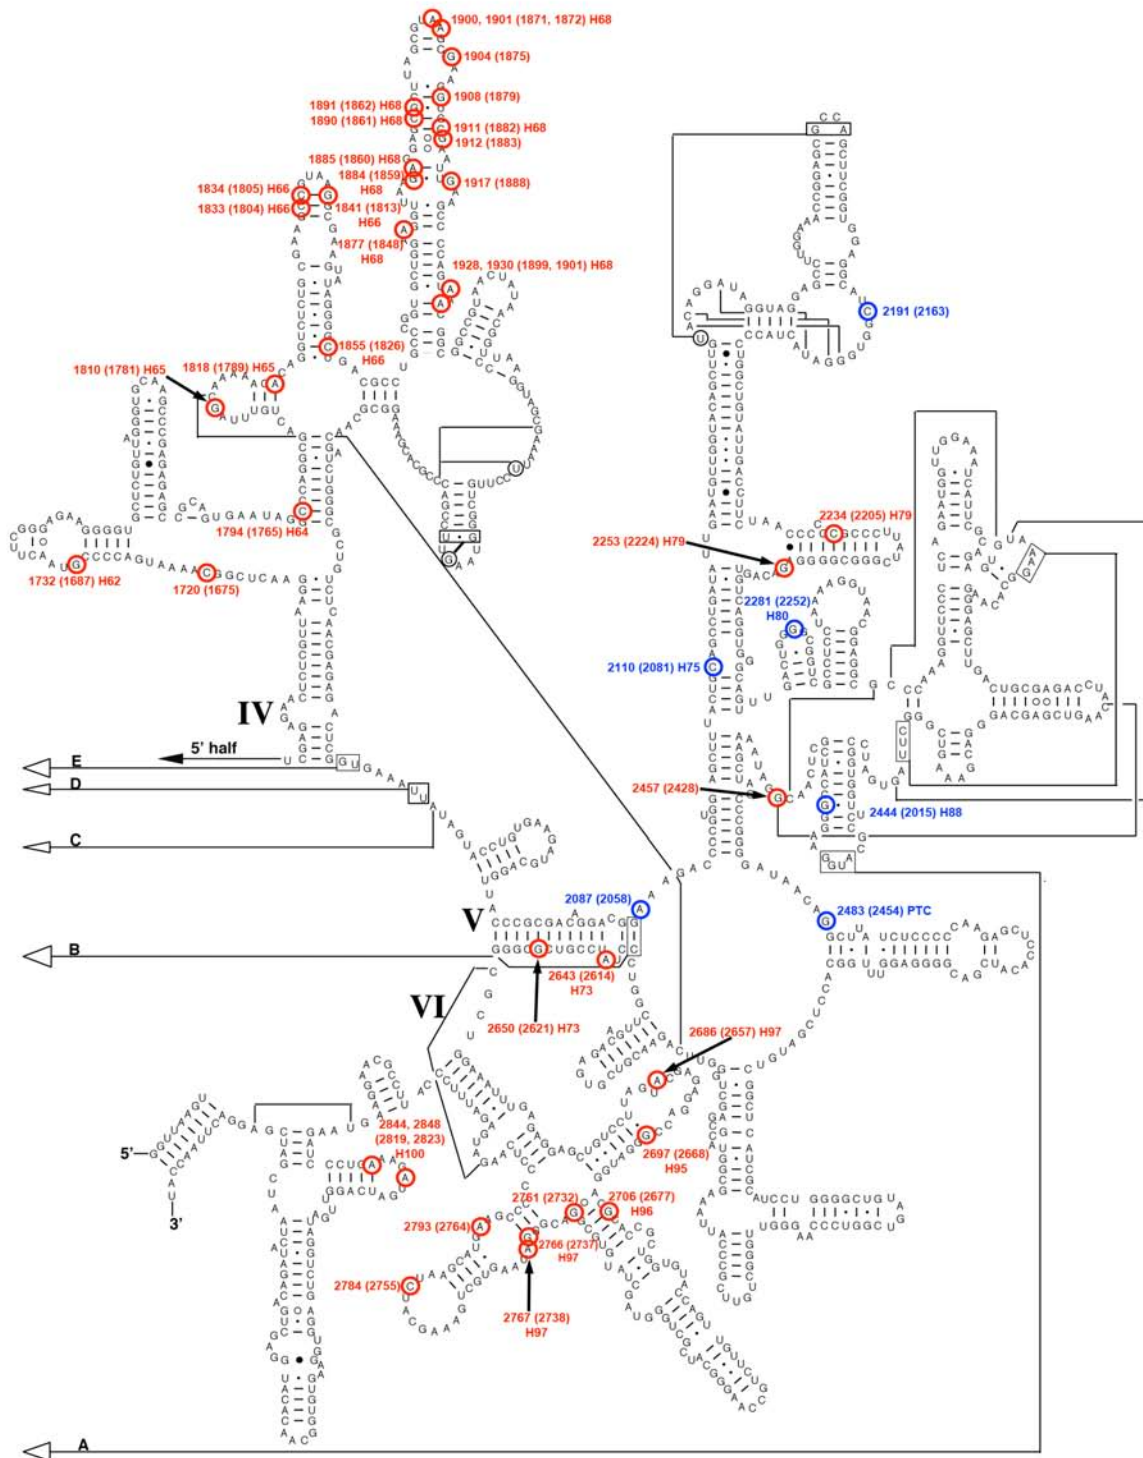

**Supplementary Figure S11. Chemical modifications by DMS and kethoxal mapped in the secondary structure of the 23S rRNA (3'-half).** Bases with increased (red) and decreased (blue) reactivity in the 45S particle compared to the mature 50S subunit are labeled in the secondary structure diagram of the 23S rRNA from *Bacillus subtilis*. Numbers in brackets correspond to *E. coli* numbering of the 23S rRNA).

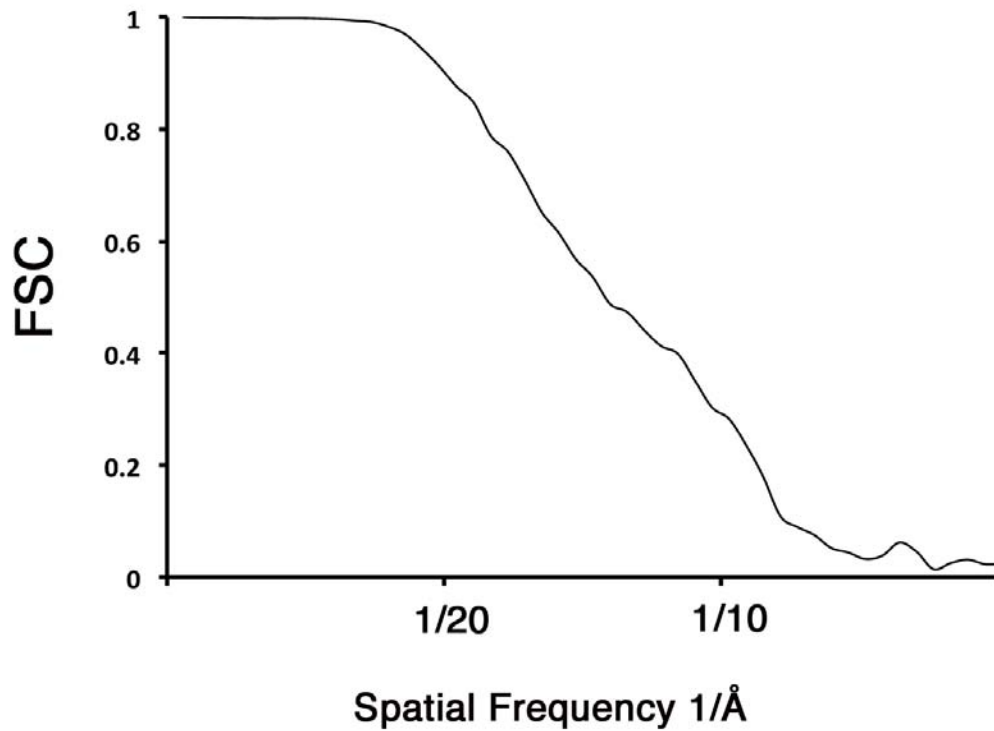

**Supplementary Figure S12. Fourier Shell Correlation plots for resolution estimation of the L16-depleted 50S subunit reconstruction.** Using the the FSC=0.5 criteria the estimated resolution for the 3D reconstruction of the L16-depleted 50S subunit was 13Å.

## SUPPLEMENTARY TABLES

| Primer | Modified base | Helix | <i>E. coli</i> base | Average fold modification* | Standard error | **p-value | Protein contacts                                                                               | Domain |     |
|--------|---------------|-------|---------------------|----------------------------|----------------|-----------|------------------------------------------------------------------------------------------------|--------|-----|
| rp 357 | 193           | H11   | 190                 | 3.49                       | 0.087          | 0.0202    | None                                                                                           | I      |     |
|        | 90            | H7    | 90                  | 3.36                       | 1.218          | 0.070     | L23-Arg69                                                                                      |        |     |
| rp601  | 456           | H22   | 408                 | 4.25                       | 1.729          | 0.041     | None                                                                                           |        |     |
|        | 530           | H24   | 483                 | 3.09                       | 0.554          | 0.024     | L24-Lys43,His44,Gln45,Pro54,Lys46                                                              |        |     |
| rp846  | 753           |       | 706                 | 6.12                       | 2.128          | 0.006     | L2-R13                                                                                         |        |     |
| rp1055 | 961           | H38   | 914                 | 4.70                       | 1.110          | 0.007     | between L16 and L27 but no protein contacts                                                    | II     |     |
|        | 955           | H38   | 908                 | 3.60                       | 0.850          | 0.010     | L16-Asp70,Thr24,Phe68                                                                          |        |     |
| rp1245 | 1142          | H44   | 1096                | 3.78                       | 1.063          | 0.042     | None                                                                                           |        |     |
|        | 1118          | H43   | 1072                | 2.55                       | 0.201          | 0.008     | None                                                                                           |        |     |
|        | 1110          | H43   | 1064                | 2.91                       | 0.324          | 0.012     | L11-Gly90,Gly88                                                                                |        |     |
|        | 1098          | H42   | 1052                | 2.47                       | 0.223          | 0.009     | None                                                                                           |        |     |
|        | 1089          | H42   | 1043                | 3.78                       | 0.787          | 0.034     | None                                                                                           |        |     |
| rp1505 | 1442          |       | 1403                | 4.96                       | 2.520          | 0.101     | None                                                                                           |        | III |
|        | 1434          | H53   | 1395                | 4.93                       | 0.914          | 0.013     | None                                                                                           |        |     |
|        | 1415          | H52   | 1376                | 2.61                       | 0.389          | 0.024     | None                                                                                           |        |     |
|        | 1381          |       | 1342                | 3.18                       | 0.794          | 0.042     | L23-Asn59,Val58,Lys40                                                                          |        |     |
| rp1726 | None          |       |                     |                            |                |           |                                                                                                |        |     |
| rp1920 | 1855          | H66   | 1826                | 2.27                       | 0.095          | 0.003     | L2-Gly221,Thr222,His231,Asn238,His242,                                                         | IV     |     |
|        | 1834          | H66   | 1805                | 3.22                       | 0.401          | 0.013     | L2-Asn45,Thr50,Arg51,Thr245                                                                    |        |     |
|        | 1818          | H65   | 1789                | 3.31                       | 0.420          | 0.012     | L2-Val219,Arg220,Gly221,Pro217                                                                 |        |     |
|        | 1794          | H64   | 1765                | 4.50                       | 0.801          | 0.021     | None                                                                                           |        |     |
|        | 1720          |       | 1675                | 2.35                       | 0.195          | 0.012     | L3-His134                                                                                      |        |     |
| rp2066 | 1930          | H68   | 1901                | 11.03                      | 2.917          | 0.019     | L2-Gln250                                                                                      |        |     |
|        | 1928          | H68   | 1899                | 14.76                      | 4.637          | 0.023     | None                                                                                           |        |     |
|        | 1911          | H68   | 1882                | 9.55                       | 2.989          | 0.028     | None                                                                                           |        |     |
|        | 1901          | H68   | 1872                | 10.46                      | 2.657          | 0.017     | None                                                                                           |        |     |
|        | 1900          | H68   | 1871                | 7.90                       | 1.990          | 0.022     | None                                                                                           |        |     |
|        | 1890          | H68   | 1861                | 23.67                      | 6.455          | 0.007     | None                                                                                           |        |     |
|        | 1885          | H68   | 1860                | 33.42                      | 9.088          | 0.005     | None                                                                                           |        |     |
|        | 1877          | H68   | 1848                | 17.47                      | 5.529          | 0.012     | None                                                                                           |        |     |
| rp2296 | 2234          | H79   | 2205                | 6.31                       | 2.084          | 0.036     | L2-Gly148,Lys67                                                                                | V      |     |
|        | 2191          |       | 2163                | 4.60                       | 1.610          | 0.058     | None                                                                                           |        |     |
|        | 2110          | H75   | 2081                | 4.84                       | 1.827          | 0.067     | L31(or L28 in <i>T. thermophilus</i> )-Ser15,Cys16,Ser17,Cys18,Gly19,Asn20, Val21, Met22,Lys23 |        |     |
| 2087   |               | 2058  | 4.77                | 2.170                      | 0.085          | None      |                                                                                                |        |     |
| rp2405 | None          |       |                     |                            |                |           |                                                                                                |        |     |
| rp2572 | None          |       |                     |                            |                |           |                                                                                                |        |     |
| rp2703 | 2643          | H73   | 2614                | 3.26                       | 0.721          | 0.011     | L32-Ala1                                                                                       | IV     |     |
| rp2913 | 2848          | H100  | 2823                | 2.32                       | 0.676          | 0.004     | L3-Phe118,Gly117,Lys116, L17-Met1                                                              |        |     |
|        | 2844          | H100  | 2819                | 4.19                       | 1.450          | 0.039     | L17-Lys5,                                                                                      |        |     |
|        | 2793          |       | 2764                | 2.68                       | 1.094          | 0.071     | None                                                                                           |        |     |
|        | 2784          |       | 2755                | 4.16                       | 0.649          | 0.012     | L36-Arg19,Arg36                                                                                |        |     |
|        | 2767          | H97   | 2738                | 3.25                       | 0.390          | 0.001     | None                                                                                           |        |     |
|        | 2686          | H95   | 2657                | 2.62                       | 0.033          | 0.014     | L6-Val91,Tyr93,Lys159,                                                                         |        |     |

**Supplementary Table 1. Chemical modifications of the 23S rRNA in the 45S particle using DMS. (\*)** Cells highlighted in red color depict increased modification in the 45S subunit, whereas blue color depicts increased modification in the 50S subunit. (\*\*) A one sample two-tailed T-test was carried out on log transformed data and the p-value was calculated.

| Primer | Modified base | Helix | <i>E. coli</i> base | Average fold modification* | Standard error | **p-value | Protein contacts                                                  | Domain |
|--------|---------------|-------|---------------------|----------------------------|----------------|-----------|-------------------------------------------------------------------|--------|
| rp357  | 197           | H11   | 194                 | 3.09                       | 0.404          | 0.015     | None                                                              | I      |
| rp601  | 528           |       | 481                 | 2.40                       | 0.513          | 0.023     | L24-Lys43                                                         |        |
|        | 406           |       | 363                 | 7.51                       | 1.659          | 0.012     | None                                                              |        |
| rP846  | 721           |       | 675                 | 4.45                       | 1.219          | 0.010     | L4-Gln62,Gly71,Lys58,Ser72                                        | II     |
| rp1055 | 953           | H38   | 906                 | 10.67                      | 3.087          | 0.016     | L16-Asp25,Arg66,Phe28,Phe68                                       |        |
|        | 916           | H38   | 869                 | 5.83                       | 1.631          | 0.029     | L16-Asp70,Met12,Phe9                                              |        |
|        | 911           | H38   | 864                 | 5.35                       | 1.406          | 0.023     | L16-His13                                                         |        |
|        | 879           | H37   | 832                 | 3.84                       | 1.194          | 0.061     | None                                                              |        |
| rp1245 | 1177          |       | 1131                | 6.12                       | 1.274          | 0.009     | L13-His77,Lys85,Ile81                                             |        |
|        | 1166          | H42   | 1120                | 5.73                       | 0.679          | 0.014     | None                                                              |        |
|        | 1114          | H43   | 1068                | 12.98                      | 3.824          | 0.002     | None                                                              |        |
|        | 1105          | H43   | 1059                | 4.81                       | 0.844          | 0.004     | L11-Gly130,Ser127,Met116,Lys112,Ala75,Arg133,Thr131,Asp115,Ile128 |        |
|        | 1102          | H43   | 1056                | 3.52                       | 0.609          | 0.001     | none                                                              |        |
| rp1505 | None          |       |                     |                            |                |           |                                                                   |        |
| rp1726 | None          |       |                     |                            |                |           | III                                                               |        |
| rp1920 | 1841          | H66   | 1813                | 2.44                       | 0.236          | 0.013     | L2-Arg42,Thr49,Thr50,Arg51                                        | IV     |
|        | 1833          | H66   | 1804                | 3.94                       | 0.987          | 0.030     | L2-Arg51,Trp247,Lys254                                            |        |
|        | 1810          | H65   | 1781                | 2.03                       | 0.120          | 0.007     | L34-Arg3                                                          |        |
|        | 1732          | H62   | 1687                | 3.63                       | 0.478          | 0.010     | None                                                              |        |
| rp2066 | 1917          | H68   | 1888                | 4.77                       | 0.318          | 0.002     | None                                                              |        |
|        | 1912          |       | 1883                | 7.67                       | 1.738          | 0.017     | None                                                              |        |
|        | 1908          |       | 1879                | 7.70                       | 1.498          | 0.012     | None                                                              |        |
|        | 1904          |       | 1875                | 6.39                       | 1.045          | 0.007     | None                                                              |        |
|        | 1891          | H68   | 1862                | 7.03                       | 1.997          | 0.036     | None                                                              |        |
|        | 1884          | H68   | 1859                | 4.50                       | 0.520          | 0.006     | None                                                              |        |
|        | 1841          | H66   | 1813                | 4.84                       | 0.874          | 0.015     | L2-Asn43,Asn44,Asn45,Thr49,Thr50,Arg51                            |        |
|        | 1841          | H66   | 1813                | 4.84                       | 0.874          | 0.015     | L2-Asn43,Asn44,Asn45,Thr49,Thr50,Arg51                            |        |
| rp2296 | none          |       |                     |                            |                |           |                                                                   |        |
| rp2405 |               |       |                     |                            |                |           |                                                                   |        |
|        | 2281          | H80   | 2252                | 57.78                      | 21.199         | 0.007     | None                                                              | V      |
|        | 2253          | H79   | 2224                | 3.72                       | 0.744          | 0.031     | None                                                              |        |
| rp2572 | 2483          | PTC   | 2454                | 6.77                       | 1.630          | 0.014     | None                                                              |        |
|        | 2457          |       | 2428                | 2.60                       | 0.153          | 0.004     | L15-Leu61,Tyr58,                                                  |        |
|        | 2444          | H88   | 2415                | 5.18                       | 0.088          | <.001     | L15-Thr67,Phe66,Gly65                                             |        |
| rp2703 | None          |       |                     |                            |                |           |                                                                   |        |
| rp2913 | 2766          | H97   | 2737                | 3.14                       | 0.224          | 0.004     | L13-Met92,Arg95                                                   | VI     |
|        | 2761          | H97   | 2732                | 4.37                       | 1.330          | 0.046     | None                                                              |        |
|        | 2706          | H96   | 2677                | 2.87                       | 0.207          | 0.005     | L3-Phe127,Trp125                                                  |        |
|        | 2697          | H95   | 2668                | 3.05                       | 0.592          | 0.029     | L6-Ser109                                                         |        |
|        | 2650          | H73   | 2621                | 3.19                       | 0.078          | <.001     | L3-Arg124,Gly163,Gln164,Phe118                                    |        |

**Supplementary Table 2. Chemical modifications of the 23S rRNA in the 45S particle using kethoxal. (\*)** Cells highlighted in red color depict increased modification in the 45S subunit, whereas blue color depicts increased modification in the 50S subunit. (\*\*) A one sample two-tailed T-test was carried out on log transformed data and the p-value was calculated.



**Supplementary Table 3. Primers used in the DMS and Kethoxal chemical probing of the 23S rRNA in the mature 50S subunit and 45S particle assembly intermediate.**

| Oligonucleotide Name | Sequence                                 |
|----------------------|------------------------------------------|
| Bs_rp354             | 5' 6-FAM CCTTTCCAGACCTCTTCATCTACC-3'     |
| Bs_rp601             | 5' 6-FAM ATCACCCGTTAACGGGCTCTGACT-3'     |
| Bs_rp846             | 5' 6-FAM CCAGGTTTCGATTGGCATTTCACC-3'     |
| Bs_rp1055            | 5' 6-FAM TTGGGACCTTAGCTGGCGGTC-3'        |
| Bs_rp1245            | 5' 6-FAM CTTAGAACGCTCTCCTACCACTGT-3'     |
| Bs_rp1505            | 5' 6-FAM ATCCAATACCGCGCTTACCCTATC-3'     |
| Bs_rp1726            | 5' 6-FAM CATTTTGCCGAGTTCCTTAACGAGAG-3'   |
| Bs_rp1920            | 5' 6-FAM CTTCAATTTCGCACCTTCGCTTACG-3'    |
| Bs_rp2066            | 5' 6-FAM TGCATCTTCACAGGTACTATAATTTACC-3' |
| Bs_rp2296            | 5' 6-FAM TTAGGAGGCGACCGCCCCAGTCA-3'      |
| Bs_rp2405            | 5' 6-FAM TCGTCCCTGCTCGACTTGTAGGT-3'      |
| Bs_rp2572            | 5' 6-FAM CTTGGGACCGACTACAGCCCC-3'        |
| Bs_rp2703            | 5' 6-FAM CCATCCCGGTCCTCTCGTAC-3'         |
| Bs_rp2913            | 5' 6-FAM ATCGATTAGTATCTGTTCAGCTCCATGT-3' |

All primers used in this study were 5' 6-carboxyfluorescein (6-FAM) labeled.

The number in Oligos name indicate the starting base position in 23S rRNA (*rrnA* gene). “Bs” stands for *Bacillus subtilis* and “rp” for reverse primer.

## SUPPLEMENTARY REFERENCES

1. Chen, S.S. & Williamson, J.R. Characterization of the Ribosome Biogenesis Landscape in *E. coli* Using Quantitative Mass Spectrometry. *J Mol Biol* **425**, 767-79 (2013).
2. Chen, S.S., Sperling, E., Silverman, J.M., Davis, J.H. & Williamson, J.R. Measuring the dynamics of *E. coli* ribosome biogenesis using pulse-labeling and quantitative mass spectrometry. *Mol Biosyst* **8**, 3325-34 (2012).
